# Supplementary material for: Automated Detection of Off-Label Drug Use
Source: PubMed Central journal article supplement (PMC3929699; doi:10.1371/journal.pone.0089324), 2014-02-19
Supplement: pone.0089324.s001.pdf [file pone.0089324.s001.pdf]

| <b>Drug</b>     | <b>Indication</b>                  | <b>FAERS Support</b> | <b>MEDLINE Support</b> | <b>Cost Index</b> | <b>Risk Index</b> |
|-----------------|------------------------------------|----------------------|------------------------|-------------------|-------------------|
| venlafaxine     | depressed mood                     | 2058                 | 95                     | 0.481             | 0.857             |
| alendronic acid | osteopenia                         | 1996                 | 10                     | 0.681             | 0.258             |
| mirtazapine     | depressed mood                     | 1805                 | 89                     | 0.399             | 0.932             |
| mirtazapine     | mental depression                  | 1737                 | 89                     | 0.399             | 0.932             |
| carboplatin     | carcinoma, non-small-cell lung     | 1709                 | 1126                   | 0.821             | 0.485             |
| cisplatin       | carcinoma, non-small-cell lung     | 1599                 | 2316                   | 0.114             | 0.509             |
| clonazepam      | mental depression                  | 1462                 | 14                     | 0.217             | 0.839             |
| simvastatin     | diabetes mellitus                  | 1369                 | 33                     | 0.485             | 0.253             |
| levetiracetam   | seizures                           | 1166                 | 96                     | 0.479             | 0.938             |
| phenytoin       | convulsions                        | 1056                 | 234                    | 0.151             | 0.905             |
| cisplatin       | cancer of head and neck            | 668                  | 1460                   | 0.114             | 0.509             |
| docetaxel       | malignant neoplasm of prostate     | 604                  | 640                    | 0.949             | 0.963             |
| rosuvastatin    | diabetes mellitus                  | 599                  | 6                      | 0.533             | 0.159             |
| warfarin        | pulmonary embolism                 | 554                  | 377                    | 0.219             | 0.097             |
| valproate       | mental depression                  | 552                  | 25                     | 0.349             | 0.943             |
| capecitabine    | malignant neoplasm of stomach      | 546                  | 136                    | 0.725             | 0.901             |
| valproic acid   | mental depression                  | 536                  | 25                     | 0.350             | 0.941             |
| pregabalin      | diabetic neuropathies              | 512                  | 53                     | 0.482             | 0.833             |
| fenofibrate     | diabetes mellitus                  | 450                  | 17                     | 0.469             | 0.656             |
| ibandronate     | osteopenia                         | 413                  | 8                      | 0.902             | 0.070             |
| gabapentin      | fibromyalgia                       | 389                  | 12                     | 0.326             | 0.802             |
| clofarabine     | leukemia, myelocytic, acute        | 341                  | 37                     | 0.869             | 0.995             |
| risedronate     | osteopenia                         | 340                  | 2                      | 0.806             | 0.214             |
| ezetimibe       | diabetes mellitus                  | 337                  | 5                      | 0.528             | 0.114             |
| clopidogrel     | angina pectoris                    | 314                  | 28                     | 0.633             | 0.158             |
| warfarin        | congestive heart failure           | 309                  | 62                     | 0.219             | 0.097             |
| montelukast     | chronic obstructive airway disease | 305                  | 9                      | 0.547             | 0.163             |
| sertraline      | bipolar disorder                   | 278                  | 18                     | 0.437             | 0.784             |
| simvastatin     | congestive heart failure           | 243                  | 23                     | 0.485             | 0.253             |
| trazodone       | bipolar disorder                   | 237                  | 21                     | 0.299             | 0.760             |
| lorazepam       | bipolar disorder                   | 224                  | 47                     | 0.273             | 0.601             |
| warfarin        | cerebrovascular accident           | 220                  | 144                    | 0.219             | 0.097             |
| risperidone     | schizoaffective disorder           | 219                  | 580                    | 0.647             | 0.782             |
| oxaliplatin     | malignant neoplasm of stomach      | 204                  | 165                    | 0.926             | 0.002             |
| simvastatin     | myocardial ischemia                | 204                  | 34                     | 0.485             | 0.253             |
| levofloxacin    | upper respiratory infections       | 201                  | 151                    | 0.708             | 0.495             |
| etoposide       | hodgkin disease                    | 198                  | 384                    | 0.720             | 0.681             |
| allopurinol     | congestive heart failure           | 195                  | 22                     | 0.572             | 0.289             |
| pimecrolimus    | eczema                             | 193                  | 15                     | 0.454             | 0.103             |
| fluoxetine      | sleeplessness                      | 190                  | 23                     | 0.491             | 0.879             |
| citalopram      | bipolar disorder                   | 184                  | 40                     | 0.387             | 0.661             |
| tamsulosin      | malignant neoplasm of prostate     | 182                  | 12                     | 0.519             | 0.496             |
| bevacizumab     | malignant neoplasm of ovary        | 170                  | 89                     | 0.879             | 0.991             |
| venlafaxine     | bipolar disorder                   | 170                  | 46                     | 0.481             | 0.857             |

|                  |                                       |     |     |       |       |
|------------------|---------------------------------------|-----|-----|-------|-------|
| paroxetine       | bipolar disorder                      | 169 | 42  | 0.426 | 0.870 |
| clonazepam       | migraine disorders                    | 169 | 7   | 0.217 | 0.839 |
| gemcitabine      | malignant neoplasm of breast          | 166 | 335 | NA    | 0.044 |
| granisetron      | nausea                                | 166 | 90  | 0.808 | 0.515 |
| clopidogrel      | transient ischemic attack             | 163 | 58  | 0.633 | 0.158 |
| venlafaxine      | sleeplessness                         | 154 | 5   | 0.481 | 0.857 |
| scopolamine      | sialorrhoea                           | 153 | 24  | 0.243 | 0.527 |
| pregabalin       | migraine disorders                    | 152 | 3   | 0.482 | 0.833 |
| dextromethorphan | coughing                              | 149 | 76  | 0.078 | 0.198 |
| carboplatin      | cancer of head and neck               | 148 | 273 | 0.821 | 0.485 |
| bicalutamide     | benign prostatic hyperplasia          | 147 | 12  | 0.695 | 0.370 |
| doxorubicin      | burkitt lymphoma                      | 147 | 130 | NA    | 0.962 |
| busulfan         | leukemia, myelocytic, acute           | 145 | 72  | 0.839 | 0.467 |
| lovastatin       | diabetes mellitus                     | 144 | 5   | 0.408 | 0.271 |
| budesonide       | bronchitis                            | 143 | 19  | 0.783 | 0.698 |
| vancomycin       | systemic infection                    | 140 | 152 | 0.726 | 0.002 |
| pregabalin       | restless legs syndrome                | 138 | 4   | 0.482 | 0.833 |
| valproate        | schizoaffective disorder              | 136 | 106 | 0.349 | 0.943 |
| rosuvastatin     | coronary artery disease               | 135 | 36  | 0.533 | 0.159 |
| warfarin         | angina pectoris                       | 131 | 20  | 0.219 | 0.097 |
| clarithromycin   | lower respiratory tract infection     | 124 | 103 | 0.524 | 0.016 |
| estradiol        | osteoporosis                          | 124 | 120 | 0.671 | 0.984 |
| mirtazapine      | schizophrenia                         | 122 | 16  | 0.399 | 0.932 |
| gemcitabine      | malignant neoplasm of urinary bladder | 121 | 281 | NA    | 0.044 |
| pregabalin       | bipolar disorder                      | 120 | 4   | 0.482 | 0.833 |
| valproic acid    | schizoaffective disorder              | 116 | 106 | 0.350 | 0.941 |
| levetiracetam    | mental depression                     | 110 | 3   | 0.479 | 0.938 |
| terbinafine      | mycoses                               | 98  | 31  | 0.635 | 0.341 |
| clopidogrel      | myocardial ischemia                   | 95  | 60  | 0.633 | 0.158 |
| etoposide        | burkitt lymphoma                      | 95  | 49  | 0.720 | 0.681 |
| mirtazapine      | bipolar disorder                      | 93  | 8   | 0.399 | 0.932 |
| carboplatin      | small cell carcinoma of lung          | 93  | 45  | 0.821 | 0.485 |
| quetiapine       | obsessive-compulsive disorder         | 93  | 32  | 0.609 | 0.859 |
| ziprasidone      | schizoaffective disorder              | 92  | 110 | 0.654 | 0.002 |
| vitamin b 12     | peripheral neuropathy                 | 90  | 20  | 0.370 | 0.082 |
| memantine        | mental depression                     | 88  | 6   | 0.592 | 0.412 |
| cyclosporine     | behcet syndrome                       | 87  | 89  | 0.513 | 0.725 |
| telmisartan      | hypercholesterolemia                  | 86  | 2   | 0.468 | 0.330 |
| tamsulosin       | urinary retention                     | 84  | 22  | 0.519 | 0.496 |
| warfarin         | blood coagulation disorders           | 81  | 101 | 0.219 | 0.097 |
| tacrolimus       | eczema                                | 81  | 30  | 0.662 | 0.934 |
| fluoxetine       | headache                              | 81  | 3   | 0.491 | 0.879 |
| megestrol        | carcinoma, non-small-cell lung        | 79  | 4   | 0.238 | 0.002 |
| voriconazole     | pneumonia                             | 79  | 8   | 0.769 | 0.570 |
| etanercept       | lupus erythematosus, systemic         | 79  | 5   | 0.932 | 0.729 |
| metformin        | hyperglycemia                         | 77  | 91  | 0.240 | 0.828 |

|                     |                                      |    |     |       |       |
|---------------------|--------------------------------------|----|-----|-------|-------|
| levofloxacin        | prostatitis                          | 75 | 52  | 0.708 | 0.495 |
| lamotrigine         | migraine disorders                   | 75 | 6   | 0.534 | 0.899 |
| promethazine        | coughing                             | 73 | 4   | 0.310 | 0.139 |
| levetiracetam       | status epilepticus                   | 72 | 59  | 0.479 | 0.938 |
| cilastatin          | pneumonia                            | 71 | 31  | 0.760 | 0.394 |
| rosuvastatin        | cerebrovascular accident             | 71 | 6   | 0.533 | 0.159 |
| adalimumab          | lupus erythematosus, systemic        | 71 | 3   | 0.959 | 0.615 |
| desvenlafaxine      | bipolar disorder                     | 71 | 46  | 0.545 | 0.130 |
| haloperidol         | delirium                             | 70 | 114 | 0.553 | 0.694 |
| metformin           | diabetes mellitus, insulin-dependent | 69 | 73  | 0.240 | 0.828 |
| quetiapine          | personality disorders                | 69 | 5   | 0.609 | 0.859 |
| mometasone          | chronic obstructive airway disease   | 67 | 4   | 0.830 | 0.614 |
| linezolid           | systemic infection                   | 65 | 24  | 0.825 | 0.277 |
| folic acid          | congestive heart failure             | 64 | 6   | 0.102 | 0.082 |
| cisplatin           | small cell carcinoma of lung         | 62 | 52  | 0.114 | 0.509 |
| simethicone         | dyspepsia                            | 61 | 15  | 0.041 | 0.002 |
| risperidone         | post-traumatic stress disorder       | 60 | 19  | 0.647 | 0.782 |
| methotrexate        | inflammation                         | 59 | 40  | 0.525 | 0.147 |
| montelukast         | sinusitis                            | 59 | 6   | 0.547 | 0.163 |
| pseudoephedrine     | coughing                             | 59 | 6   | 0.137 | 0.529 |
| montelukast         | coughing                             | 58 | 9   | 0.547 | 0.163 |
| ziprasidone         | major depressive disorder            | 56 | 14  | 0.654 | 0.002 |
| abatacept           | lupus erythematosus, systemic        | 56 | 13  | 0.943 | 0.002 |
| pravastatin         | coronary artery disease              | 55 | 102 | 0.497 | 0.502 |
| terbutaline         | chronic obstructive airway disease   | 54 | 16  | 0.405 | 0.070 |
| escitalopram        | obsessive-compulsive disorder        | 54 | 76  | 0.537 | 0.002 |
| certolizumab pegol  | ulcerative colitis                   | 52 | 13  | 0.984 | 0.577 |
| rituximab           | hodgkin disease                      | 51 | 48  | 0.821 | 0.940 |
| clonazepam          | post-traumatic stress disorder       | 51 | 9   | 0.217 | 0.839 |
| doxycycline         | rheumatoid arthritis                 | 51 | 20  | 0.443 | 0.002 |
| folic acid          | convulsions                          | 50 | 10  | 0.102 | 0.082 |
| fenofibrate         | coronary artery disease              | 49 | 19  | 0.469 | 0.656 |
| oxcarbazepine       | seizures, focal                      | 49 | 203 | 0.412 | 0.086 |
| folic acid          | seizures                             | 49 | 21  | 0.102 | 0.082 |
| clopidogrel         | arteriosclerosis                     | 48 | 50  | 0.633 | 0.158 |
| medroxyprogesterone | menorrhagia                          | 47 | 12  | 0.692 | 0.346 |
| potassium chloride  | heart failure                        | 46 | 44  | 0.161 | 0.002 |
| budesonide          | sinusitis                            | 46 | 18  | 0.783 | 0.698 |
| loratadine          | coughing                             | 46 | 2   | 0.173 | 0.650 |
| prednisolone        | epilepsy                             | 45 | 25  | 0.472 | 0.223 |
| triazolam           | anxiety disorders                    | 45 | 18  | 0.240 | 0.553 |
| daptomycin          | osteomyelitis                        | 45 | 20  | 0.913 | 0.002 |
| folic acid          | peripheral neuropathy                | 45 | 6   | 0.102 | 0.082 |
| verapamil           | tachycardia                          | 44 | 265 | 0.329 | 0.744 |
| loratadine          | sinusitis                            | 44 | 3   | 0.173 | 0.650 |
| heparin             | congestive heart failure             | 44 | 37  | 0.268 | 0.148 |

|                       |                                    |    |     |       |       |
|-----------------------|------------------------------------|----|-----|-------|-------|
| hydroxychloroquine    | arthritis, psoriatic               | 43 | 2   | 0.242 | 0.245 |
| clarithromycin        | upper respiratory infections       | 43 | 103 | 0.524 | 0.016 |
| escitalopram          | panic disorder                     | 42 | 64  | 0.537 | 0.002 |
| anidulafungin         | aspergillosis                      | 42 | 25  | 0.874 | 0.002 |
| prednisolone          | angina pectoris                    | 41 | 3   | 0.472 | 0.223 |
| oxcarbazepine         | trigeminal neuralgia               | 41 | 13  | 0.412 | 0.086 |
| methimazole           | graves disease                     | 40 | 610 | 0.163 | 0.220 |
| nystatin              | mycoses                            | 40 | 102 | 0.697 | 0.128 |
| montelukast           | rhinitis                           | 40 | 14  | 0.547 | 0.163 |
| promethazine          | bronchitis                         | 40 | 3   | 0.310 | 0.139 |
| cilastatin            | systemic infection                 | 40 | 40  | 0.760 | 0.394 |
| clonazepam            | obsessive-compulsive disorder      | 40 | 21  | 0.217 | 0.839 |
| simvastatin           | arteriosclerosis                   | 40 | 55  | 0.485 | 0.253 |
| tacrolimus            | ulcerative colitis                 | 40 | 43  | 0.662 | 0.934 |
| levofloxacin          | neutropenia                        | 39 | 15  | 0.708 | 0.495 |
| levofloxacin          | septicemia                         | 39 | 27  | 0.708 | 0.495 |
| fludarabine           | waldenstrom macroglobulinemia      | 39 | 66  | 0.895 | 0.987 |
| cyclophosphamide      | vasculitis                         | 39 | 259 | 0.831 | 0.070 |
| medroxyprogesterone   | sleep disorders                    | 38 | 2   | 0.692 | 0.346 |
| vincristine           | myeloid leukemia, chronic          | 38 | 40  | 0.650 | 0.002 |
| vigabatrin            | seizures                           | 38 | 52  | 0.779 | 0.002 |
| donepezil             | parkinson disease                  | 38 | 36  | 0.635 | 0.410 |
| mesalamine            | ankylosing spondylitis             | 38 | 6   | 0.787 | 0.672 |
| allopurinol           | hypokalemia                        | 38 | 2   | 0.572 | 0.289 |
| leuprolide            | menorrhagia                        | 37 | 8   | 0.967 | 0.903 |
| diazepam              | peripheral neuropathy              | 37 | 5   | 0.512 | 0.617 |
| levofloxacin          | systemic infection                 | 36 | 26  | 0.708 | 0.495 |
| gabapentin            | post-traumatic stress disorder     | 36 | 4   | 0.326 | 0.802 |
| cilastatin            | septicemia                         | 36 | 40  | 0.760 | 0.394 |
| clonazepam            | major depressive disorder          | 36 | 9   | 0.217 | 0.839 |
| sertraline            | personality disorders              | 36 | 4   | 0.437 | 0.784 |
| sucralfate            | dyspepsia                          | 35 | 20  | 0.185 | 0.002 |
| mometasone            | rhinitis                           | 35 | 14  | 0.830 | 0.614 |
| triptorelin           | malignant neoplasm of breast       | 35 | 32  | 0.981 | 0.002 |
| sitagliptin           | hyperglycemia                      | 35 | 9   | 0.568 | 0.112 |
| flutamide             | benign prostatic hyperplasia       | 35 | 30  | 0.348 | 0.321 |
| dolasetron            | nausea                             | 34 | 18  | 0.800 | 0.059 |
| triamcinolone         | macular retinal edema              | 34 | 485 | 0.431 | 0.460 |
| clarithromycin        | gastroesophageal reflux disease    | 34 | 15  | 0.524 | 0.016 |
| infliximab            | pyoderma gangrenosum               | 34 | 68  | 0.953 | 0.793 |
| nebivolol             | congestive heart failure           | 34 | 61  | 0.356 | 0.068 |
| topiramate            | schizophrenia                      | 34 | 21  | 0.522 | 0.846 |
| olanzapine            | post-traumatic stress disorder     | 34 | 11  | 0.785 | 0.875 |
| mycophenolate mofetil | nephrotic syndrome                 | 33 | 59  | 0.576 | 1.000 |
| nicotine              | chronic obstructive airway disease | 33 | 4   | 0.221 | 0.227 |
| potassium chloride    | angina pectoris                    | 33 | 6   | 0.161 | 0.002 |

|                          |                                      |    |     |       |       |
|--------------------------|--------------------------------------|----|-----|-------|-------|
| prednisolone             | temporal arteritis                   | 33 | 154 | 0.472 | 0.223 |
| voriconazole             | systemic candidiasis                 | 33 | 117 | 0.769 | 0.570 |
| dipyridamole             | hypercholesterolemia                 | 33 | 10  | 0.313 | 0.595 |
| daptomycin               | bacteremia                           | 32 | 89  | 0.913 | 0.002 |
| linezolid                | osteomyelitis                        | 32 | 41  | 0.825 | 0.277 |
| dapsone                  | acne vulgaris                        | 32 | 30  | 0.354 | 0.081 |
| amphetamine              | sleep disorders                      | 31 | 10  | 0.518 | 0.348 |
| tamsulosin               | prostatitis                          | 31 | 13  | 0.519 | 0.496 |
| exenatide                | diabetes mellitus, insulin-dependent | 31 | 26  | 0.885 | 0.526 |
| alprazolam               | obsessive-compulsive disorder        | 31 | 8   | 0.278 | 0.841 |
| tinzaparin               | thrombosis                           | 30 | 13  | 0.846 | 0.002 |
| levofloxacin             | chronic sinusitis                    | 30 | 36  | 0.708 | 0.495 |
| mirtazapine              | parkinson disease                    | 30 | 3   | 0.399 | 0.932 |
| doxazosin                | malignant neoplasm of prostate       | 30 | 20  | 0.188 | 0.810 |
| felodipine               | hyperlipidemia                       | 30 | 2   | 0.350 | 0.626 |
| fenofibrate              | cerebrovascular accident             | 29 | 4   | 0.469 | 0.656 |
| amphotericin b liposomal | septicemia                           | 29 | 3   | 0.859 | 0.002 |
| heparin                  | hypotension                          | 29 | 8   | 0.268 | 0.148 |
| cefuroxime               | upper respiratory infections         | 28 | 66  | 0.702 | 0.070 |
| ciclesonide              | chronic obstructive airway disease   | 28 | 3   | 0.720 | 0.051 |
| erlotinib                | malignant neoplasm of ovary          | 28 | 16  | 0.864 | 0.751 |
| piperacillin             | osteomyelitis                        | 27 | 8   | 0.755 | 0.016 |
| pseudoephedrine          | upper respiratory infections         | 27 | 3   | 0.137 | 0.529 |
| etanercept               | inflammation                         | 27 | 41  | 0.932 | 0.729 |
| cetuximab                | malignant neoplasm of larynx         | 27 | 3   | 0.649 | 0.886 |
| adalimumab               | fever                                | 27 | 2   | 0.959 | 0.615 |
| erlotinib                | glioblastoma                         | 27 | 28  | 0.864 | 0.751 |
| liraglutide              | diabetes mellitus, insulin-dependent | 27 | 4   | 0.800 | 0.070 |
| chlorpheniramine         | bronchitis                           | 26 | 4   | 0.124 | 0.005 |
| nebivolol                | heart failure                        | 26 | 61  | 0.356 | 0.068 |
| topotecan                | neuroblastoma                        | 26 | 47  | 0.950 | 0.844 |
| guaifenesin              | upper respiratory infections         | 26 | 15  | 0.101 | 0.103 |
| mephobarbital            | epilepsy                             | 25 | 23  | 0.192 | 0.020 |
| levofloxacin             | bacteremia                           | 25 | 43  | 0.708 | 0.495 |
| tazobactam               | osteomyelitis                        | 25 | 3   | 0.752 | 0.002 |
| pantoprazole             | peptic ulcer                         | 25 | 54  | 0.540 | 0.002 |
| cyclosporine             | pyoderma gangrenosum                 | 25 | 84  | 0.513 | 0.725 |
| lorazepam                | muscle spasticity                    | 24 | 2   | 0.273 | 0.601 |
| methylprednisolone       | migraine disorders                   | 24 | 6   | 0.605 | 0.079 |
| clonazepam               | manic                                | 24 | 5   | 0.217 | 0.839 |
| tazobactam               | bacterial infections                 | 24 | 83  | 0.752 | 0.002 |
| glucosamine              | crohn disease                        | 24 | 29  | 0.143 | 0.002 |
| methylprednisolone       | bacterial infections                 | 23 | 13  | 0.605 | 0.079 |
| sotalol                  | anxiety disorders                    | 23 | 3   | 0.410 | 0.874 |
| sulbactam                | infection                            | 23 | 2   | 0.699 | 0.097 |
| ziprasidone              | obsessive-compulsive disorder        | 23 | 5   | 0.654 | 0.002 |

|                    |                                       |    |     |       |       |
|--------------------|---------------------------------------|----|-----|-------|-------|
| gabapentin         | seizures, focal                       | 23 | 213 | 0.326 | 0.802 |
| clotrimazole       | mycoses                               | 23 | 73  | 0.228 | 0.436 |
| topiramate         | post-traumatic stress disorder        | 23 | 13  | 0.522 | 0.846 |
| paclitaxel         | malignant neoplasm of urinary bladder | 23 | 153 | 0.776 | 0.956 |
| allopurinol        | arthritis, gouty                      | 23 | 45  | 0.572 | 0.289 |
| haloperidol        | alzheimer's disease                   | 23 | 40  | 0.553 | 0.694 |
| isoniazid          | crohn disease                         | 22 | 4   | 0.164 | 0.002 |
| ranitidine         | esophagitis                           | 22 | 49  | 0.359 | 0.016 |
| moxifloxacin       | systemic infection                    | 22 | 4   | 0.714 | 0.284 |
| daptomycin         | systemic infection                    | 22 | 8   | 0.913 | 0.002 |
| tazobactam         | bacteremia                            | 22 | 12  | 0.752 | 0.002 |
| diclofenac         | lupus erythematosus, systemic         | 22 | 5   | 0.409 | 0.756 |
| methylprednisolone | edema                                 | 21 | 49  | 0.605 | 0.079 |
| alteplase          | deep vein thrombosis                  | 21 | 119 | 0.974 | 0.002 |
| prednisolone       | migraine disorders                    | 21 | 9   | 0.472 | 0.223 |
| voriconazole       | candidiasis                           | 21 | 117 | 0.769 | 0.570 |
| alfuzosin          | urinary retention                     | 21 | 24  | 0.517 | 0.104 |
| certolizumab pegol | arthritis, psoriatic                  | 21 | 3   | 0.984 | 0.577 |
| hydrocodone        | sinusitis                             | 20 | 2   | 0.208 | 0.676 |
| amphotericin b     | pneumonia                             | 20 | 59  | 0.754 | 0.002 |
| methylprednisolone | angina pectoris                       | 20 | 2   | 0.605 | 0.079 |
| vancomycin         | peritonitis                           | 20 | 166 | 0.726 | 0.002 |
| carbamazepine      | manic                                 | 20 | 76  | 0.146 | 0.789 |
| carbidopa          | tremor                                | 20 | 20  | 0.248 | 0.537 |
| lamotrigine        | manic                                 | 20 | 20  | 0.534 | 0.899 |
| topiramate         | epilepsies, myoclonic                 | 20 | 11  | 0.522 | 0.846 |
| sorafenib          | gastrointestinal stromal tumors       | 20 | 8   | 0.815 | 0.919 |
| hydrocortisone     | migraine disorders                    | 19 | 10  | 0.515 | 0.234 |
| hydroxychloroquine | inflammation                          | 19 | 7   | 0.242 | 0.245 |
| methotrexate       | liver diseases                        | 19 | 4   | 0.525 | 0.147 |
| methylprednisolone | pruritus                              | 19 | 9   | 0.605 | 0.079 |
| zinc oxide         | hemorrhoids                           | 19 | 4   | 0.075 | 0.002 |
| pamidronate        | osteogenesis imperfecta               | 19 | 110 | 0.835 | 0.971 |
| cisplatin          | malignant neoplasm of larynx          | 19 | 162 | 0.114 | 0.509 |
| risperidone        | personality disorders                 | 19 | 4   | 0.647 | 0.782 |
| topiramate         | absence epilepsy                      | 19 | 14  | 0.522 | 0.846 |
| cyclophosphamide   | choriocarcinoma                       | 19 | 109 | 0.831 | 0.070 |
| pimecrolimus       | dermatitis                            | 19 | 6   | 0.454 | 0.103 |
| isoniazid          | ulcerative colitis                    | 18 | 2   | 0.164 | 0.002 |
| tetracycline       | rosacea                               | 18 | 74  | 0.119 | 0.344 |
| tramadol           | major depressive disorder             | 18 | 4   | 0.346 | 0.722 |
| zafirlukast        | chronic obstructive airway disease    | 18 | 4   | 0.323 | 0.086 |
| budesonide         | bronchial spasm                       | 18 | 4   | 0.783 | 0.698 |
| cetirizine         | rhinitis                              | 18 | 19  | 0.301 | 0.597 |
| nebivolol          | angina pectoris                       | 18 | 9   | 0.356 | 0.068 |
| alendronic acid    | hypercalcemia                         | 18 | 29  | 0.681 | 0.258 |

|                      |                              |    |     |       |       |
|----------------------|------------------------------|----|-----|-------|-------|
| pantoprazole         | gastrointestinal hemorrhage  | 18 | 17  | 0.540 | 0.002 |
| cyclosporine         | acute leukemia               | 18 | 31  | 0.513 | 0.725 |
| glucosamine          | psoriasis                    | 18 | 2   | 0.143 | 0.002 |
| lovastatin           | cerebrovascular accident     | 17 | 4   | 0.408 | 0.271 |
| piroxicam            | arthritis, psoriatic         | 17 | 2   | 0.424 | 0.560 |
| prednisolone         | respiratory tract infections | 17 | 13  | 0.472 | 0.223 |
| sulfamethoxazole     | systemic infection           | 17 | 47  | 0.270 | 0.443 |
| argatroban           | deep vein thrombosis         | 17 | 4   | 0.941 | 0.002 |
| argatroban           | deep vein thrombosis         | 17 | 22  | 0.941 | 0.002 |
| infliximab           | vasculitis                   | 17 | 34  | 0.953 | 0.793 |
| etanercept           | crohn disease                | 17 | 61  | 0.932 | 0.729 |
| colchicine           | hyperuricemia                | 17 | 14  | 0.197 | 0.079 |
| factor ix            | hemophilia a                 | 17 | 308 | 0.209 | 0.002 |
| imipenem             | peritonitis                  | 16 | 53  | 0.760 | 0.394 |
| levofloxacin         | osteomyelitis                | 16 | 32  | 0.708 | 0.495 |
| azathioprine         | lung diseases, interstitial  | 16 | 30  | 0.557 | 0.427 |
| cefdinir             | upper respiratory infections | 16 | 9   | 0.442 | 0.002 |
| clindamycin          | crohn disease                | 16 | 3   | 0.516 | 0.548 |
| risperidone          | panic disorder               | 16 | 3   | 0.647 | 0.782 |
| zolpidem             | panic disorder               | 16 | 2   | 0.544 | 0.815 |
| cyclophosphamide     | crohn disease                | 16 | 20  | 0.831 | 0.070 |
| cyclosporine         | hepatitis, autoimmune        | 16 | 19  | 0.513 | 0.725 |
| tacrolimus           | nephrotic syndrome           | 16 | 40  | 0.662 | 0.934 |
| micafungin           | septicemia                   | 16 | 2   | 0.877 | 0.507 |
| paclitaxel           | squamous cell carcinoma      | 16 | 484 | 0.776 | 0.956 |
| methotrexate         | malignant neoplasm of ovary  | 15 | 225 | 0.525 | 0.147 |
| methylprednisolone   | myositis                     | 15 | 25  | 0.605 | 0.079 |
| phenylephrine        | influenza                    | 15 | 3   | 0.130 | 0.262 |
| sotalol              | tachycardia                  | 15 | 62  | 0.410 | 0.874 |
| azathioprine         | vasculitis                   | 15 | 78  | 0.557 | 0.427 |
| baclofen             | bipolar disorder             | 15 | 8   | 0.367 | 0.712 |
| vitamin b 12         | seizures                     | 15 | 4   | 0.370 | 0.082 |
| budesonide           | bronchial diseases           | 15 | 4   | 0.783 | 0.698 |
| caspofungin          | septicemia                   | 15 | 6   | 0.929 | 0.002 |
| meropenem            | osteomyelitis                | 15 | 2   | 0.798 | 0.002 |
| chlorpheniramine     | upper respiratory infections | 15 | 7   | 0.124 | 0.005 |
| etanercept           | sarcoidosis                  | 15 | 15  | 0.932 | 0.729 |
| chondroitin sulfates | rheumatoid arthritis         | 15 | 6   | 0.598 | 0.002 |
| sirolimus            | leukemia, myelocytic, acute  | 15 | 17  | 0.666 | 0.002 |
| tazobactam           | neutropenia                  | 15 | 21  | 0.752 | 0.002 |
| carboplatin          | malignant neoplasm of testis | 15 | 186 | 0.821 | 0.485 |
| entecavir            | hiv infections               | 15 | 29  | 0.724 | 0.397 |
| drotrecogin alfa     | pneumonia                    | 15 | 2   | 0.959 | 0.002 |
| olanzapine           | panic disorder               | 15 | 5   | 0.785 | 0.875 |
| fluoxetine           | schizoaffective disorder     | 15 | 29  | 0.491 | 0.879 |
| nitroglycerin        | edema                        | 15 | 2   | 0.438 | 0.379 |

|                    |                                   |    |     |       |       |
|--------------------|-----------------------------------|----|-----|-------|-------|
| haloperidol        | major depressive disorder         | 15 | 22  | 0.553 | 0.694 |
| hydroxychloroquine | dermatomyositis                   | 14 | 25  | 0.242 | 0.245 |
| amikacin           | neutropenia                       | 14 | 74  | 0.537 | 0.002 |
| amikacin           | infectious disease of lung        | 14 | 21  | 0.537 | 0.002 |
| methotrexate       | hodgkin disease                   | 14 | 166 | 0.525 | 0.147 |
| fexofenadine       | dermatitis, atopic                | 14 | 7   | 0.373 | 0.418 |
| vitamin b 12       | convulsions                       | 14 | 2   | 0.370 | 0.082 |
| vitamin d          | rickets                           | 14 | 414 | 0.039 | 0.002 |
| mirtazapine        | panic disorder                    | 14 | 8   | 0.399 | 0.932 |
| captopril          | cerebrovascular accident          | 14 | 6   | 0.209 | 0.454 |
| tigecycline        | systemic infection                | 14 | 6   | 0.824 | 0.628 |
| cinacalcet         | osteoporosis                      | 14 | 3   | 0.734 | 0.864 |
| estradiol          | urinary incontinence              | 14 | 15  | 0.671 | 0.984 |
| etoposide          | nephroblastoma                    | 14 | 34  | 0.720 | 0.681 |
| fluconazole        | aspergillosis                     | 14 | 122 | 0.621 | 0.147 |
| haloperidol        | personality disorders             | 14 | 18  | 0.553 | 0.694 |
| heparin            | endocarditis                      | 14 | 2   | 0.268 | 0.148 |
| amantadine         | muscle spasticity                 | 14 | 3   | 0.191 | 0.198 |
| methotrexate       | multiple myeloma                  | 13 | 33  | 0.525 | 0.147 |
| pseudoephedrine    | lower respiratory tract infection | 13 | 3   | 0.137 | 0.529 |
| levetiracetam      | absence epilepsy                  | 13 | 16  | 0.479 | 0.938 |
| vancomycin         | arthritis, infectious             | 13 | 22  | 0.726 | 0.002 |
| vincristine        | leukemia, myelocytic, acute       | 13 | 461 | 0.650 | 0.002 |
| vitamin b 12       | iron deficiency anemia            | 13 | 13  | 0.370 | 0.082 |
| lansoprazole       | gastrointestinal hemorrhage       | 13 | 7   | 0.578 | 0.456 |
| leflunomide        | inflammation                      | 13 | 5   | 0.685 | 0.753 |
| candesartan        | migraine disorders                | 13 | 3   | 0.441 | 0.040 |
| cilastatin         | peritonitis                       | 13 | 34  | 0.760 | 0.394 |
| clonazepam         | personality disorders             | 13 | 2   | 0.217 | 0.839 |
| clotrimazole       | onychomycosis                     | 13 | 10  | 0.228 | 0.436 |
| escitalopram       | phobia, social                    | 13 | 24  | 0.537 | 0.002 |
| levocetirizine     | dermatitis, atopic                | 13 | 2   | 0.439 | 0.408 |
| epirubicin         | carcinoma, non-small-cell lung    | 13 | 70  | 0.853 | 0.908 |
| estradiol          | polycystic ovary syndrome         | 13 | 160 | 0.671 | 0.984 |
| sotalol            | congestive heart failure          | 12 | 10  | 0.410 | 0.874 |
| voriconazole       | infectious disease of lung        | 12 | 3   | 0.769 | 0.570 |
| cetirizine         | dermatitis                        | 12 | 3   | 0.301 | 0.597 |
| finasteride        | prostatitis                       | 12 | 10  | 0.440 | 0.134 |
| cefoperazone       | systemic infection                | 12 | 21  | NA    | 0.002 |
| ondansetron        | hyperemesis gravidarum            | 12 | 6   | 0.729 | 0.002 |
| meropenem          | bacteremia                        | 12 | 27  | 0.798 | 0.002 |
| alendronic acid    | fracture                          | 12 | 15  | 0.681 | 0.258 |
| acyclovir          | lymphoma                          | 12 | 10  | 0.455 | 0.403 |
| ranolazine         | congestive heart failure          | 12 | 13  | 0.534 | 0.106 |
| desloratadine      | rhinitis                          | 12 | 6   | 0.538 | 0.264 |
| micafungin         | aspergillosis                     | 12 | 67  | 0.877 | 0.507 |



|                  |                                      |    |     |       |       |
|------------------|--------------------------------------|----|-----|-------|-------|
| anidulafungin    | candidiasis                          | 12 | 69  | 0.874 | 0.002 |
| ofatumumab       | lymphoma, non-hodgkin                | 12 | 3   | 0.852 | 0.482 |
| glucosamine      | ankylosing spondylitis               | 12 | 3   | 0.143 | 0.002 |
| ifosfamide       | nephroblastoma                       | 11 | 32  | 0.843 | 0.868 |
| azathioprine     | inflammation                         | 11 | 25  | 0.557 | 0.427 |
| azathioprine     | liver diseases                       | 11 | 46  | 0.557 | 0.427 |
| calcitriol       | kidney failure                       | 11 | 4   | 0.558 | 0.002 |
| fludarabine      | hodgkin disease                      | 11 | 20  | 0.895 | 0.987 |
| fludarabine      | myeloid leukemia, chronic            | 11 | 22  | 0.895 | 0.987 |
| cephalexin       | folliculitis                         | 11 | 2   | 0.386 | 0.002 |
| loratadine       | dermatitis, atopic                   | 11 | 10  | 0.173 | 0.650 |
| clorazepate      | bipolar disorder                     | 11 | 3   | 0.300 | 0.478 |
| chlorhexidine    | multiple myeloma                     | 11 | 4   | 0.305 | 0.018 |
| cilastatin       | bacteremia                           | 11 | 13  | 0.760 | 0.394 |
| oxaliplatin      | malignant neoplasm of breast         | 11 | 40  | 0.926 | 0.002 |
| clofazimine      | tuberculosis                         | 11 | 17  | NA    | 0.002 |
| cyclophosphamide | polyarteritis nodosa                 | 11 | 176 | 0.831 | 0.070 |
| glipizide        | diabetes mellitus, insulin-dependent | 11 | 8   | 0.166 | 0.044 |
| heparin          | transient ischemic attack            | 11 | 65  | 0.268 | 0.148 |
| enoxaparin       | angina pectoris                      | 10 | 14  | 0.850 | 0.947 |
| iloperidone      | bipolar disorder                     | 10 | 3   | 0.648 | 0.892 |
| ranitidine       | lung diseases                        | 10 | 2   | 0.359 | 0.016 |
| asparaginase     | leukemia, myelocytic, acute          | 10 | 184 | 0.823 | 0.002 |
| scopolamine      | diarrhea                             | 10 | 4   | 0.243 | 0.527 |
| sulbactam        | bacterial infections                 | 10 | 230 | 0.699 | 0.097 |
| azathioprine     | eczema                               | 10 | 11  | 0.557 | 0.427 |
| rabeprazole      | esophagitis                          | 10 | 12  | 0.588 | 0.002 |
| ibandronate      | multiple myeloma                     | 10 | 14  | 0.902 | 0.070 |
| verapamil        | mitral valve prolapse syndrome       | 10 | 5   | 0.329 | 0.744 |
| azithromycin     | lyme disease                         | 10 | 12  | 0.680 | 0.328 |
| clarithromycin   | tuberculosis                         | 10 | 41  | 0.524 | 0.016 |
| daptomycin       | arthritis, infectious                | 10 | 4   | 0.913 | 0.002 |
| gabapentin       | manic                                | 10 | 15  | 0.326 | 0.802 |
| leflunomide      | lupus erythematosus, systemic        | 10 | 10  | 0.685 | 0.753 |
| tacrolimus       | dermatitis                           | 10 | 23  | 0.662 | 0.934 |
| bupropion        | panic disorder                       | 10 | 5   | 0.436 | 0.817 |
| ezetimibe        | hypertriglyceridemia                 | 10 | 3   | 0.528 | 0.114 |
| dextromethorphan | bronchitis                           | 10 | 2   | 0.078 | 0.198 |
| tizanidine       | epilepsy                             | 10 | 2   | 0.326 | 0.855 |
| atovaquone       | babesiosis                           | 10 | 30  | 0.597 | 0.002 |
| fluconazole      | psoriasis                            | 10 | 2   | 0.621 | 0.147 |
