# Supplementary material for: Automated Detection of Off-Label Drug Use
Source: PubMed Central journal article supplement (PMC3929699; doi:10.1371/journal.pone.0089324), 2014-02-19
Supplement: pone.0089324.s002.pdf [file pone.0089324.s002.pdf]

**Simvastatin**

q-value &lt;= 0.05

**Up in disease, down with treatment**AMIT SERUM RESPONSE 40  
MCF10A'FERRANDO T ALL WITH MLL  
ENL FUSION DN'

RUIZ TNC TARGETS DN'

CROONQUIST IL6  
DEPRIVATION DN'**Down in disease, up with treatment**LI ADIPOGENESIS BY  
ACTIVATED PPARG'**Type 2 Diabetes Mellitus**'Genes whose expression peaked at 40 min after stimulation of MCF10A cells with serum.'  
'Top 100 genes negatively associated with T-cell acute lymphoblastic leukemia MLL T-ALL)

expressing MLL-ENL fusion

[GeneID=4297;4298].'

'Genes down-regulated in T98G cells (glioblastoma) by TNC [GeneID=3371].'

'Genes down-regulated in the ANBL-6 cell line (multiple myeloma, MM) after withdrawal of IL6 [GeneID=3569].'

'Adipocyte genes induced in 3T3-L1 cells (adipocyte) by constitutively active PPARG [GeneID=5468] or its agonist, TZD [PubChem=5437].'

**Sirolimus**

q-value &lt;= 0.01

**Up in disease, down with treatment**

KEGG SPLICEOSOME'

MIPS SPLICEOSOME'

MIPS C COMPLEX

SPLICEOSOME'

REACTOME PROCESSING OF

CAPPED INTRON CONTAINING

PRE MRNA'

REACTOME TRANSPORT OF

MATURE TRANSCRIPT TO

CYTOPLASM'

REACTOME MRNA

PROCESSING'

REACTOME MRNA SPLICING'

REACTOME MRNA 3 END

PROCESSING'

REACTOME CLEAVAGE OF

GROWING TRANSCRIPT IN THE

TERMINATION REGION '

**AML**

'Spliceosome'

'Spliceosome'

'C complex spliceosome'

'Genes involved in Processing of Capped Intron-Containing Pre-mRNA'

'Genes involved in Transport of Mature Transcript to Cytoplasm'

'Genes involved in mRNA Processing'

'Genes involved in mRNA Splicing'

'Genes involved in mRNA 3''-end processing'

'Genes involved in Cleavage of Growing Transcript in the Termination Region '

|                                                             |                                                                                                                                                                                                                                         |
|-------------------------------------------------------------|-----------------------------------------------------------------------------------------------------------------------------------------------------------------------------------------------------------------------------------------|
| PICCALUGA<br>ANGIOIMMUNOBLASTIC<br>LYMPHOMA DN'             | 'Down-regulated genes in angioimmunoblastic lymphoma (AILT) compared to normal T lymphocytes.'                                                                                                                                          |
| GARY CD5 TARGETS DN'                                        | 'Genes down-regulated in Daudi cells (B lymphocytes) stably expressing CD5 [GeneID=921] off a plasmid vector.'                                                                                                                          |
| GINESTIER BREAST CANCER<br>20Q13 AMPLIFICATION DN'          | 'Genes down-regulated in metastatic breast cancer tumors having type 2 amplification in the 20q13 region; involves MYBL2, STK6 and ZNF217 [GeneID=4605;6790;7764]'                                                                      |
| RODRIGUES THYROID<br>CARCINOMA POORLY<br>DIFFERENTIATED UP' | 'Genes up-regulated in poorly differentiated thyroid carcinoma (PDTc) compared to normal thyroid tissue.'                                                                                                                               |
| RODRIGUES THYROID<br>CARCINOMA ANAPLASTIC UP'               | 'Genes up-regulated in anaplastic thyroid carcinoma (ATC) compared to normal thyroid tissue.'                                                                                                                                           |
| HAHTOLA MYCOSIS<br>FUNGOIDES CD4 DN'                        | 'Genes down-regulated in T helper cells (defines as CD4+) isolated from patients with mucosis fungoides compared to those from normal control donors.'                                                                                  |
| ENK UV RESPONSE<br>KERATINOCYTE DN'                         | 'Genes down-regulated in NHEK cells (normal epidermal keratinocytes) after UVB irradiation.'                                                                                                                                            |
| GRAESSMANN RESPONSE TO<br>MC AND DOXORUBICIN DN'            | 'Genes down-regulated in ME-A cells (breast cancer, sensitive to apoptotic stimuli) exposed to doxorubicin [PubChem=31703] in the presence of medium concentrate (MC) from ME-C cells (breast cancer, resistant to apoptotic stimuli).' |
| HAMAI APOPTOSIS VIA TRAIL<br>UP'                            | 'Genes up-regulated in T1 cells (primary melanoma, sensitive to TRAIL [GeneID=8743]) compared to G1 cells (metastatic melanoma, resistant to TRAIL).'                                                                                   |
| SEIDEN ONCOGENESIS BY<br>MET'                               | 'Genes changed in xenograft tumors formed by DLD-1 or DKO-4 cells (colon cancer) overexpressing MET [GeneID=4233].'                                                                                                                     |
| SCHLOSSER MYC TARGETS<br>REPRESSED BY SERUM'                | 'Cluster 7: genes up-regulated in B493-6 cells (B lymphocytes) by MYC [GeneID=4609] and down-regulated by the combination of MYC and serum.'                                                                                            |
| DACOSTA UV RESPONSE VIA<br>ERCC3 COMMON DN'                 | 'Common down-regulated transcripts in fibroblasts expressing either XP/CS or TDD mutant forms of ERCC3 [GeneID=2071], after UVC irradiation.'                                                                                           |

|                                                    |                                                                                                                                                                                                               |
|----------------------------------------------------|---------------------------------------------------------------------------------------------------------------------------------------------------------------------------------------------------------------|
| SCHAEFFER PROSTATE DEVELOPMENT AND CANCER BOX4 DN' | 'Early prostate development genes (down-regulated at 6 hr dihydrotestosterone [PubChem=10635]) which are also down-regulated in localized vs metastatic prostate cancers.'                                    |
| SHEN SMARCA2 TARGETS UP'                           | 'Genes whose expression positively correlated with that of SMARCA2 [GeneID=6595] in prostate cancer samples.'                                                                                                 |
| SCHUHMACHER MYC TARGETS UP'                        | 'Genes up-regulated in P493-6 cells (Burkitt's lymphoma) induced to express MYC [GeneID=4609].'                                                                                                               |
| PENG GLUTAMINE DEPRIVATION DN'                     | 'Genes down-regulated in BJAB cells (B-lymphoma) after glutamine [PubChem=738] deprivation.'                                                                                                                  |
| ZHAN MULTIPLE MYELOMA SUBGROUPS'                   | 'Top genes up-regulated in MM4 vs MM1 subgroup of multiple myeloma samples.'                                                                                                                                  |
| MOREAUX MULTIPLE MYELOMA BY TACI DN'               | 'Down-regulated genes distinguishing in multiple myeloma (MM) samples with lower expression of TACI [GeneID=23495].'<br>'Genes whose CpG islands showed greatly increased histone H4 acetylation in NB4 cells |
| NOUZOVA TRETINOIN AND H4 ACETYLATION'              | (acute promyelocytic leukemia, APL) upon treatment with tretinoin [PubChem=5538].'                                                                                                                            |
| DEBIASI APOPTOSIS BY REOVIRUS INFECTION UP'        | 'Genes up-regulated in HEK293 cells (embryonic kidney) at 6 h, 12 h or 24 h after infection with reovirus strain T3A (known as a strong inducer of apoptosis).'                                               |
| RAMALHO STEMNESS UP'                               | 'Genes enriched in embryonic, neural and hematopoietic stem cells.'                                                                                                                                           |
| DAZARD RESPONSE TO UV NHEK DN'                     | 'Genes down-regulated in NHEK cells (normal keratinocytes) by UV-B irradiation.'                                                                                                                              |
| DAZARD UV RESPONSE CLUSTER G6'                     | 'Cluster G6: genes increasingly down-regulated in NHEK cells (normal keratinocyte) after UV-B irradiation.'                                                                                                   |
| DE YY1 TARGETS DN'                                 | 'Genes down-regulated in SaOS-2 cells (osteosarcoma) upon knockdown of YY1 [GeneID=7528] by RNAi.'                                                                                                            |
| CHEN HOXA5 TARGETS 9HR UP'                         | 'Genes up-regulated 9 h after induction of HoxA5 [GeneID=3205] expression in a breast cancer cell line.'                                                                                                      |
| ZHANG TLX TARGETS 36HR DN'                         | 'Genes down-regulated in neural stem cells (NSC) at 36 h after cre-lox knockout of TLX (NR2E1) [GeneID=7101].'                                                                                                |

|                                                               |                                                                                                                                                                                |
|---------------------------------------------------------------|--------------------------------------------------------------------------------------------------------------------------------------------------------------------------------|
| WENDT COHESIN TARGETS UP'                                     | 'Cohesin targets identified by CHIP-chip which were up-regulated after knockdown of CTCF and RAD21 [GeneID=10664;5885] by RNAi.'                                               |
| MILI PSEUDOPODIA HAPTOTAXIS UP'                               | 'Transcripts enriched in pseudopodia of NIH/3T3 cells (fibroblast) in response to haptotactic migratory stimulus by fibronectin, FN1 [GeneID=2335].'                           |
| THILLAINADESAN ZNF217 TARGETS UP'                             | 'Genes bound and activated by ZNF217 [GeneID=7764] in MCF7 cells (breast cancer).'                                                                                             |
| JOHNSTONE PARVB TARGETS 2 DN'                                 | 'Genes down-regulated upon overexpression of PARVB [GeneID=29780] in MDA-MB-231 cells (breast cancer) cultured in 3D collagen I and 3D Matrigel only.'                         |
| <b>Down in disease, up with treatment</b>                     |                                                                                                                                                                                |
| KEGG GRAFT VERSUS HOST DISEASE'                               | 'Graft-versus-host disease'                                                                                                                                                    |
| REACTOME METABOLISM OF STEROID HORMONES AND VITAMINS A AND D' | 'Genes involved in Metabolism of steroid hormones and vitamins A and D'                                                                                                        |
| REACTOME EXTRACELLULAR MATRIX ORGANIZATION'                   | 'Genes involved in Extracellular matrix organization'                                                                                                                          |
| REACTOME PEPTIDE LIGAND BINDING RECEPTORS'                    | 'Genes involved in Peptide ligand-binding receptors'                                                                                                                           |
| PICCALUGA ANGIOIMMUNOBLASTIC LYMPHOMA UP'                     | 'Up-regulated genes in angioimmunoblastic lymphoma (AILT) compared to normal T lymphocytes.'                                                                                   |
| SENGUPTA NASOPHARYNGEAL CARCINOMA WITH LMP1 DN'               | 'Genes down-regulated in nasopharyngeal carcinoma (NPC) positive for LMP1 [GeneID=9260], a latent gene of Epstein-Barr virus (EBV).'                                           |
| JAEGER METASTASIS DN'                                         | 'Genes down-regulated in metastases from malignant melanoma compared to the primary tumors.'                                                                                   |
| TAKEDA TARGETS OF NUP98 HOXA9 FUSION 8D DN'                   | 'Genes down-regulated in CD34+ [GeneID=947] hematopoietic cells by expression of NUP98-HOXA9 fusion [GeneID=4928;3205] off a retroviral vector at 8 days after transduction.'  |
| TAKEDA TARGETS OF NUP98 HOXA9 FUSION 10D DN'                  | 'Genes down-regulated in CD34+ [GeneID=947] hematopoietic cells by expression of NUP98-HOXA9 fusion [GeneID=4928;3205] off a retroviral vector at 10 days after transduction.' |

|                                                                                        |                                                                                                                                                                                                                                                                                                                                           |
|----------------------------------------------------------------------------------------|-------------------------------------------------------------------------------------------------------------------------------------------------------------------------------------------------------------------------------------------------------------------------------------------------------------------------------------------|
| TAKEDA TARGETS OF NUP98<br>HOXA9 FUSION 16D DN'<br>SABATES COLORECTAL<br>ADENOMA UP'   | 'Genes down-regulated in CD34+ [GeneID=947]<br>hematopoietic cells by expression of NUP98-<br>HOXA9 fusion [GeneID=4928;3205] off a<br>retroviral vector at 16 days after transduction.'<br>'Genes up-regulated in colorectal adenoma<br>compared to normal mucosa samples.'                                                              |
| JAATINEN HEMATOPOIETIC<br>STEM CELL DN'                                                | 'Genes down-regulated in CD133+<br>[GeneID=8842] cells (hematopoietic stem cells,<br>HSC) compared to the CD133- cells.'<br>'Genes identified by subtractive hybridization<br>comparing malignant and benign components<br>of a hepatocellular carcinoma (HCC) in a pre-<br>existing liver adenoma in a morphologically<br>normal liver.' |
| CAVARD LIVER CANCER<br>MALIGNANT VS BENIGN'<br>TARTE PLASMA CELL VS<br>PLASMABLAST UP' | 'Genes up-regulated in mature plasma cells<br>compared with plasmablastic B lymphocytes.'<br>'Genes down-regulated in hematopoietic<br>precursor cells conditionally expressing HOXA9<br>and MEIS1 [GeneID=3205;4211].'                                                                                                                   |
| HESS TARGETS OF HOXA9 AND<br>MEIS1 DN'                                                 | 'Genes down-regulated during in vitro<br>maturation of CD14+ [GeneID=929] monocytes<br>(day 0) into immature (day 7) and mature<br>dendritic cells (day 14).'                                                                                                                                                                             |
| LENAOUR DENDRITIC CELL<br>MATURATION DN'                                               | 'Genes up-regulated at 6 months of age in lungs<br>from LIPA [GeneID=3988] knockout mice, which<br>display pulmonary pathology.'                                                                                                                                                                                                          |
| LIAN LIPA TARGETS 6M'                                                                  | 'Genes up-regulated at 3 months of age in lungs<br>from LIPA [GeneID=3988] knockout mice, which<br>display pulmonary pathology.'                                                                                                                                                                                                          |
| LIAN LIPA TARGETS 3M'                                                                  |                                                                                                                                                                                                                                                                                                                                           |
| MCLACHLAN DENTAL CARIES<br>DN'                                                         | 'Genes down-regulated in pulpal tissue<br>extracted from carious teeth.'                                                                                                                                                                                                                                                                  |
| MCLACHLAN DENTAL CARIES<br>UP'                                                         | 'Genes up-regulated in pulpal tissue extracted<br>from carious teeth.'                                                                                                                                                                                                                                                                    |
| SMID BREAST CANCER<br>LUMINAL B DN'                                                    | 'Genes down-regulated in the luminal B<br>subtype of breast cancer.'                                                                                                                                                                                                                                                                      |
| ZHENG IL22 SIGNALING UP'                                                               | 'Genes up-regulated in ex-vivo colonic tissue<br>after treatment with IL22 [GeneID=50616].'<br>'Tumorigenesis markers of head and neck<br>squamous cell carcinoma (HNSCC): up-<br>regulated in the "early" tumors vs normal<br>samples.'                                                                                                  |
| CROMER TUMORIGENESIS UP'                                                               |                                                                                                                                                                                                                                                                                                                                           |

NAKAYAMA SOFT TISSUE  
TUMORS PCA1 UP'

'Top 100 probe sets contributing to the  
positive side of the 1st principal component;  
predominantly associated with spindle cell and  
pleomorphic sarcoma samples.'
