# Supplementary material for: Automated Detection of Off-Label Drug Use
Source: PubMed Central journal article supplement (PMC3929699; doi:10.1371/journal.pone.0089324), 2014-02-19
Supplement: pone.0089324.s003.pdf [file pone.0089324.s003.pdf]

## High Cost, High Risk

| <b>Drug</b> | <b>Indication</b>                     | <b>FAERS<br/>Support</b> | <b>MEDLINE<br/>Support</b> | <b>Cost<br/>Index</b> | <b>Risk<br/>Index</b> |
|-------------|---------------------------------------|--------------------------|----------------------------|-----------------------|-----------------------|
| docetaxel   | malignant neoplasm of prostate        | 604                      | 640                        | 0.949                 | 0.963                 |
| clofarabine | leukemia, myelocytic, acute           | 341                      | 37                         | 0.869                 | 0.995                 |
| bevacizumab | malignant neoplasm of ovary           | 170                      | 89                         | 0.879                 | 0.991                 |
| rituximab   | hodgkin disease                       | 51                       | 48                         | 0.821                 | 0.940                 |
| fludarabine | waldenstrom macroglobulinemia         | 39                       | 66                         | 0.895                 | 0.987                 |
| leuprolide  | menorrhagia                           | 37                       | 8                          | 0.967                 | 0.903                 |
| olanzapine  | post-traumatic stress disorder        | 34                       | 11                         | 0.785                 | 0.875                 |
| topotecan   | neuroblastoma                         | 26                       | 47                         | 0.950                 | 0.844                 |
| paclitaxel  | malignant neoplasm of urinary bladder | 23                       | 153                        | 0.776                 | 0.956                 |
| sorafenib   | gastrointestinal stromal tumors       | 20                       | 8                          | 0.815                 | 0.919                 |
| pamidronate | osteogenesis imperfecta               | 19                       | 110                        | 0.835                 | 0.971                 |
| paclitaxel  | squamous cell carcinoma               | 16                       | 484                        | 0.776                 | 0.956                 |
| olanzapine  | panic disorder                        | 15                       | 5                          | 0.785                 | 0.875                 |
| epirubicin  | carcinoma, non-small-cell lung        | 13                       | 70                         | 0.853                 | 0.908                 |
| ifosfamide  | nephroblastoma                        | 11                       | 32                         | 0.843                 | 0.868                 |
| fludarabine | hodgkin disease                       | 11                       | 20                         | 0.895                 | 0.987                 |
| fludarabine | myeloid leukemia, chronic             | 11                       | 22                         | 0.895                 | 0.987                 |
| enoxaparin  | angina pectoris                       | 10                       | 14                         | 0.850                 | 0.947                 |

## Low Cost, Low Risk

| <b>Drug</b>        | <b>Indication</b>              | <b>FAERS<br/>Support</b> | <b>MEDLINE<br/>Support</b> | <b>Cost<br/>Index</b> | <b>Risk<br/>Index</b> |
|--------------------|--------------------------------|--------------------------|----------------------------|-----------------------|-----------------------|
| warfarin           | pulmonary embolism             | 554                      | 377                        | 0.219                 | 0.097                 |
| warfarin           | congestive heart failure       | 309                      | 62                         | 0.219                 | 0.097                 |
| warfarin           | cerebrovascular accident       | 220                      | 144                        | 0.219                 | 0.097                 |
| dextromethorphan   | coughing                       | 149                      | 76                         | 0.078                 | 0.198                 |
| warfarin           | angina pectoris                | 131                      | 20                         | 0.219                 | 0.097                 |
| warfarin           | blood coagulation disorders    | 81                       | 101                        | 0.219                 | 0.097                 |
| megestrol          | carcinoma, non-small-cell lung | 79                       | 4                          | 0.238                 | 0.002                 |
| promethazine       | coughing                       | 73                       | 4                          | 0.310                 | 0.139                 |
| folic acid         | congestive heart failure       | 64                       | 6                          | 0.102                 | 0.082                 |
| simethicone        | dyspepsia                      | 61                       | 15                         | 0.041                 | 0.002                 |
| folic acid         | convulsions                    | 50                       | 10                         | 0.102                 | 0.082                 |
| folic acid         | seizures                       | 49                       | 21                         | 0.102                 | 0.082                 |
| potassium chloride | heart failure                  | 46                       | 44                         | 0.161                 | 0.002                 |
| folic acid         | peripheral neuropathy          | 45                       | 6                          | 0.102                 | 0.082                 |
| heparin            | congestive heart failure       | 44                       | 37                         | 0.268                 | 0.148                 |
| hydroxychloroquine | arthritis, psoriatic           | 43                       | 2                          | 0.242                 | 0.245                 |

|                    |                                      |    |     |       |       |
|--------------------|--------------------------------------|----|-----|-------|-------|
| methimazole        | graves disease                       | 40 | 610 | 0.163 | 0.220 |
| promethazine       | bronchitis                           | 40 | 3   | 0.310 | 0.139 |
| sucralfate         | dyspepsia                            | 35 | 20  | 0.185 | 0.002 |
| nicotine           | chronic obstructive airway disease   | 33 | 4   | 0.221 | 0.227 |
| potassium chloride | angina pectoris                      | 33 | 6   | 0.161 | 0.002 |
| heparin            | hypotension                          | 29 | 8   | 0.268 | 0.148 |
| chlorpheniramine   | bronchitis                           | 26 | 4   | 0.124 | 0.005 |
| guaifenesin        | upper respiratory infections         | 26 | 15  | 0.101 | 0.103 |
| mephobarbital      | epilepsy                             | 25 | 23  | 0.192 | 0.020 |
| glucosamine        | crohn disease                        | 24 | 29  | 0.143 | 0.002 |
| isoniazid          | crohn disease                        | 22 | 4   | 0.164 | 0.002 |
| hydroxychloroquine | inflammation                         | 19 | 7   | 0.242 | 0.245 |
| zinc oxide         | hemorrhoids                          | 19 | 4   | 0.075 | 0.002 |
| isoniazid          | ulcerative colitis                   | 18 | 2   | 0.164 | 0.002 |
| zafirlukast        | chronic obstructive airway disease   | 18 | 4   | 0.323 | 0.086 |
| glucosamine        | psoriasis                            | 18 | 2   | 0.143 | 0.002 |
| colchicine         | hyperuricemia                        | 17 | 14  | 0.197 | 0.079 |
| factor ix          | hemophilia a                         | 17 | 308 | 0.209 | 0.002 |
| phenylephrine      | influenza                            | 15 | 3   | 0.130 | 0.262 |
| chlorpheniramine   | upper respiratory infections         | 15 | 7   | 0.124 | 0.005 |
| hydroxychloroquine | dermatomyositis                      | 14 | 25  | 0.242 | 0.245 |
| vitamin d          | rickets                              | 14 | 414 | 0.039 | 0.002 |
| heparin            | endocarditis                         | 14 | 2   | 0.268 | 0.148 |
| amantadine         | muscle spasticity                    | 14 | 3   | 0.191 | 0.198 |
| glucosamine        | ankylosing spondylitis               | 12 | 3   | 0.143 | 0.002 |
| chlorhexidine      | multiple myeloma                     | 11 | 4   | 0.305 | 0.018 |
| glipizide          | diabetes mellitus, insulin-dependent | 11 | 8   | 0.166 | 0.044 |
| heparin            | transient ischemic attack            | 11 | 65  | 0.268 | 0.148 |
| dextromethorphan   | bronchitis                           | 10 | 2   | 0.078 | 0.198 |
