# Supplementary material for: Automated Detection of Off-Label Drug Use
Source: PubMed Central journal article supplement (PMC3929699; doi:10.1371/journal.pone.0089324), 2014-02-19
Supplement: pone.0089324.s004.pdf [file pone.0089324.s004.pdf]

Features used for *used-to-treat* classifier

co.occur.counts  
drug.first.fractions  
loess.drug.first.fractions.fixed.drug  
loess.drug.first.fractions.fixed.disorder  
drug.counts  
disorder.counts  
odds.ratio.of.drug-indication.co-occurrence  
confidence (probability of drug occurring given the drug occurs)  
chi-sq.statistic.for.drug-indication.co-occurrence  
medispan.approved.drugs.for.disorder.count  
medispan.known.drugs.for.disorder.count  
medispan.fraction.approved.drugs.for.disorder  
max.cos.sim.for.known.disorders  
max.jac.sim.for.known.disorders  
max.cos.sim.for.known.drugs  
max.jac.sim.for.known.drugs  
drugbank.max.cos.sim.for.known.disorders  
drugbank.max.jac.sim.for.known.disorders  
drugbank.max.cos.sim.for.known.drugs  
drugbank.max.jac.sim.for.known.drugs  
drugbank.max.cos.pathway.sim.for.known.drugs  
drugbank.max.jac.pathway.sim.for.known.drugs  
drugbank.max.cos.category.sim.for.known.drugs  
drugbank.max.jac.category.sim.for.known.drugs  
drugbank.has.common.target.with.known.drug
